# Supplementary material for: The Functional Characterization of Long Noncoding RNA SPRY4-IT1 in Human Melanoma Cells
Source: PubMed Central journal article supplement (PMC4253410; doi:10.18632/oncotarget.1863), 2014-03-26
Supplement: oncotarget-05-8959-s001.pdf [file oncotarget-05-8959-s001.pdf]

## 5' RACE of Melanoma Cytoplasmic RNA

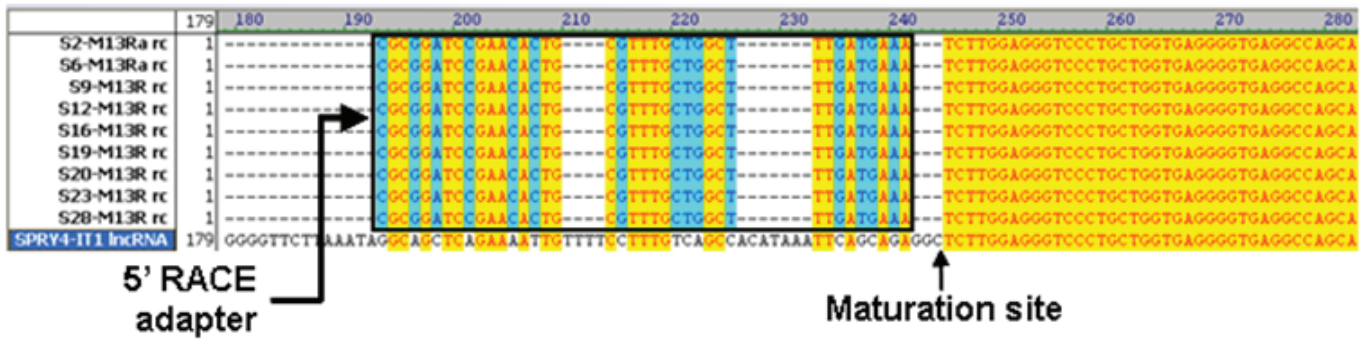

Figure S1. 5' RACE Analysis of SPRY4-IT1 in the Cytoplasm  
The 5' RACE adapter and SPRY4-IT1 maturation site are indicated.

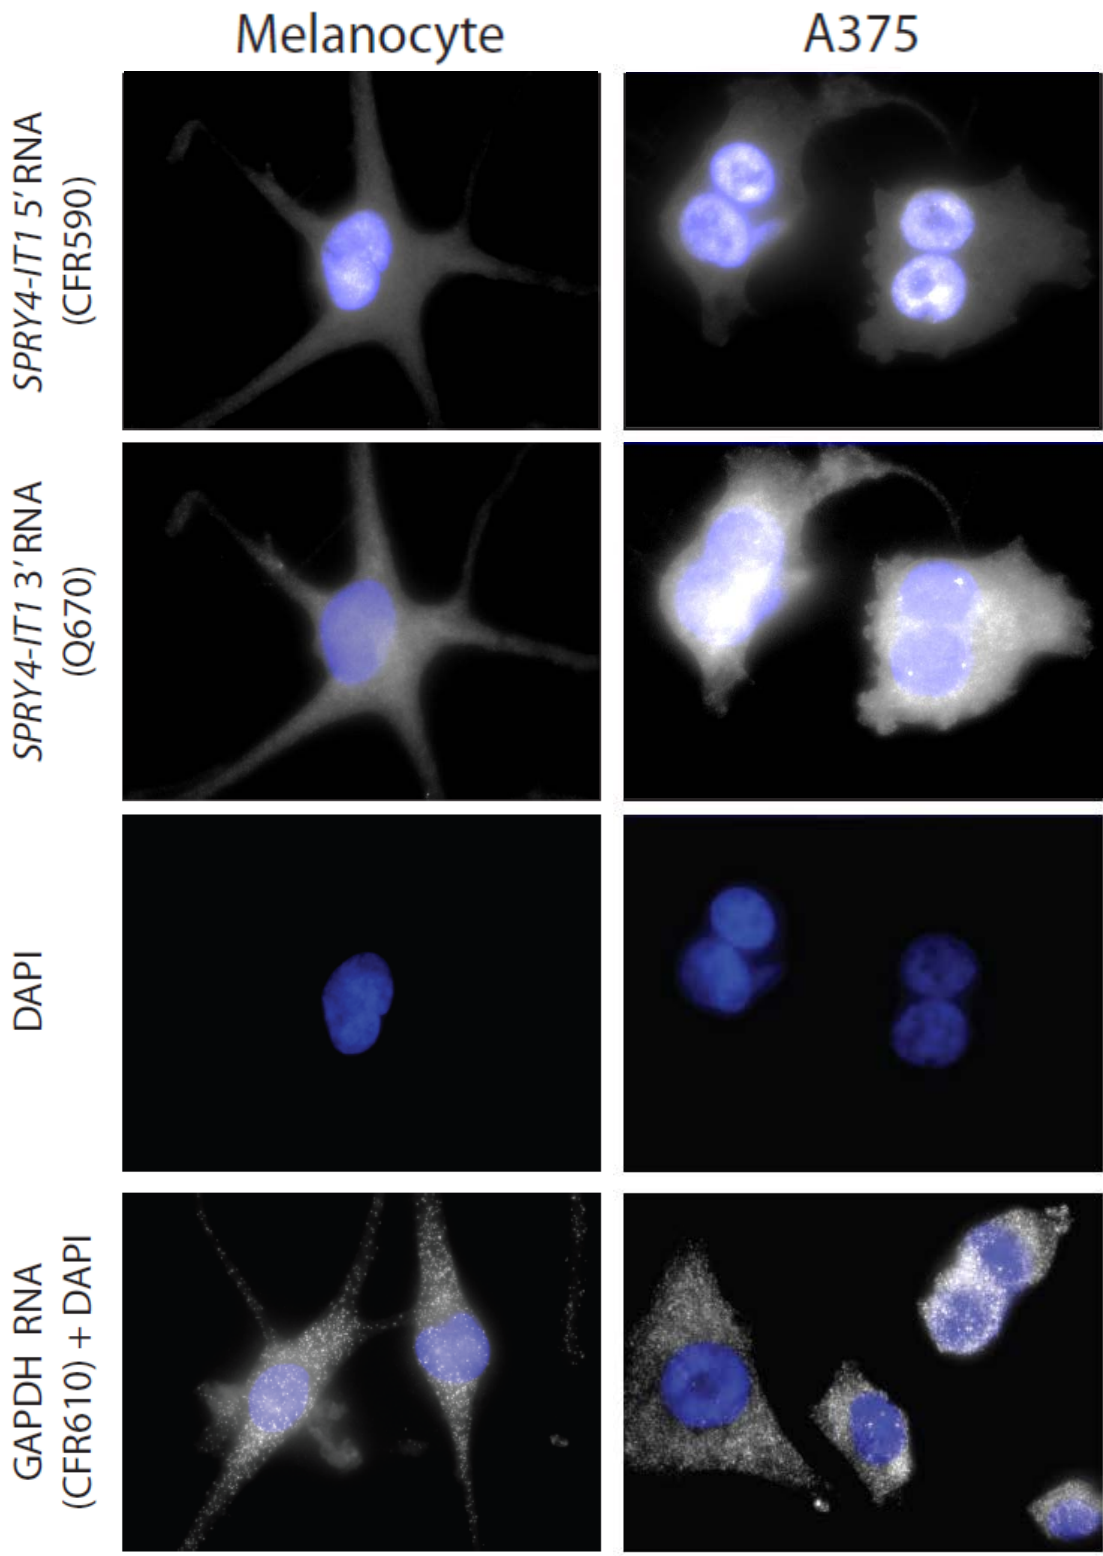

Figure S2. RNA-FISH Labeling Demonstrates the Existence of Nuclear and Cytoplasmic Forms of the SPRY4-IT1 Transcript  
 5' and 3' probes reveal nuclear and cytoplasmic expression, respectively, in melanocyte and A375 melanoma cells. GAPDH was probed as a control.

**A**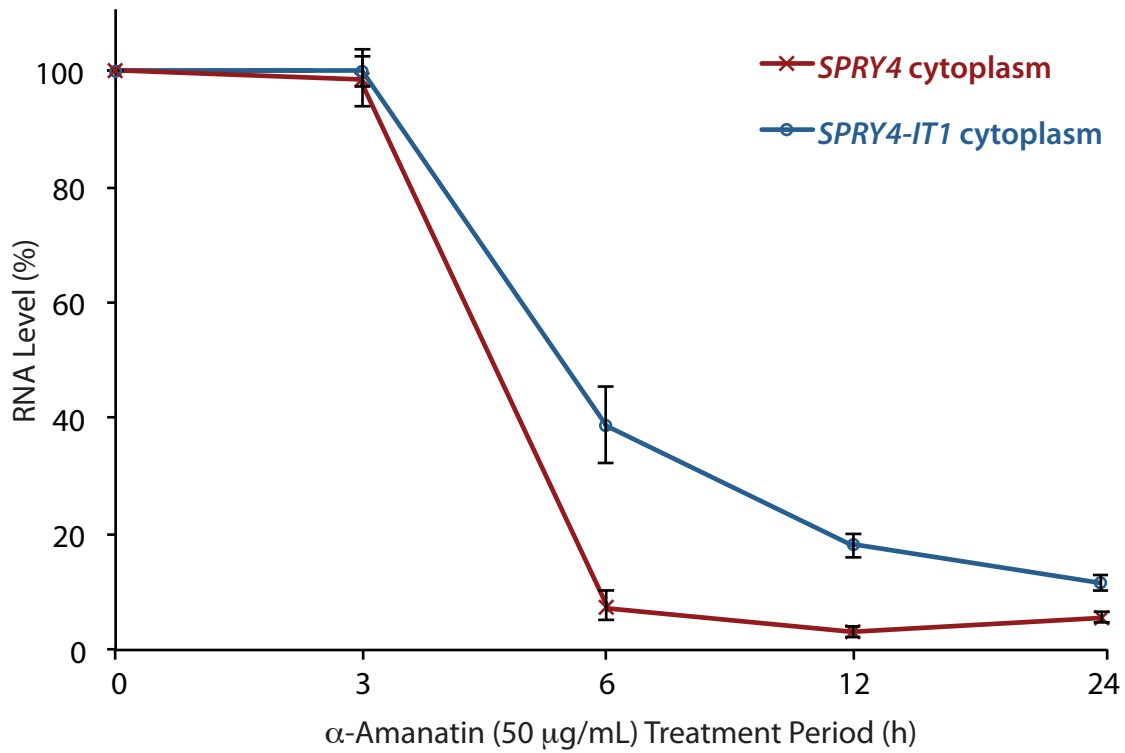**B**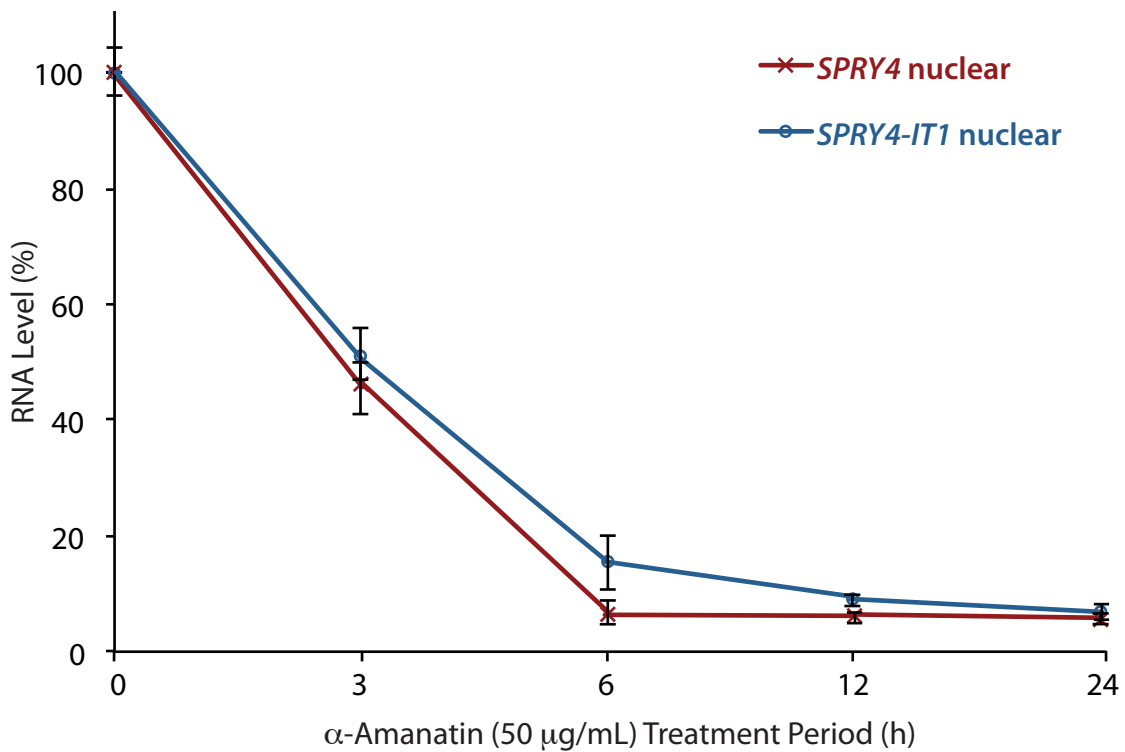

Figure S3. Relative Stability of SPRY4 and SPRY4-IT1 in Melanocytes

qRT-PCR analysis of SPRY4-IT1 and SPRY4 levels in the (A) cytoplasm and (B) nucleus of A375 cells treated with the RNA polymerase II inhibitor  $\alpha$ -amanitin for up to 24 h. SPRY4-IT1 decays more rapidly than its host gene SPRY4; at 6 h, ~80% of SPRY4-IT1 transcripts have decayed compared with ~40% of SPRY4 transcripts.

**A**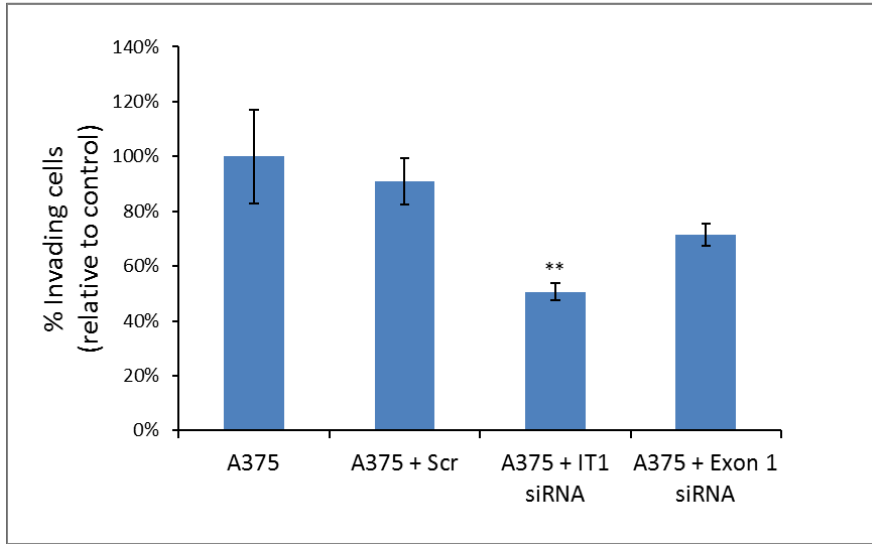**B**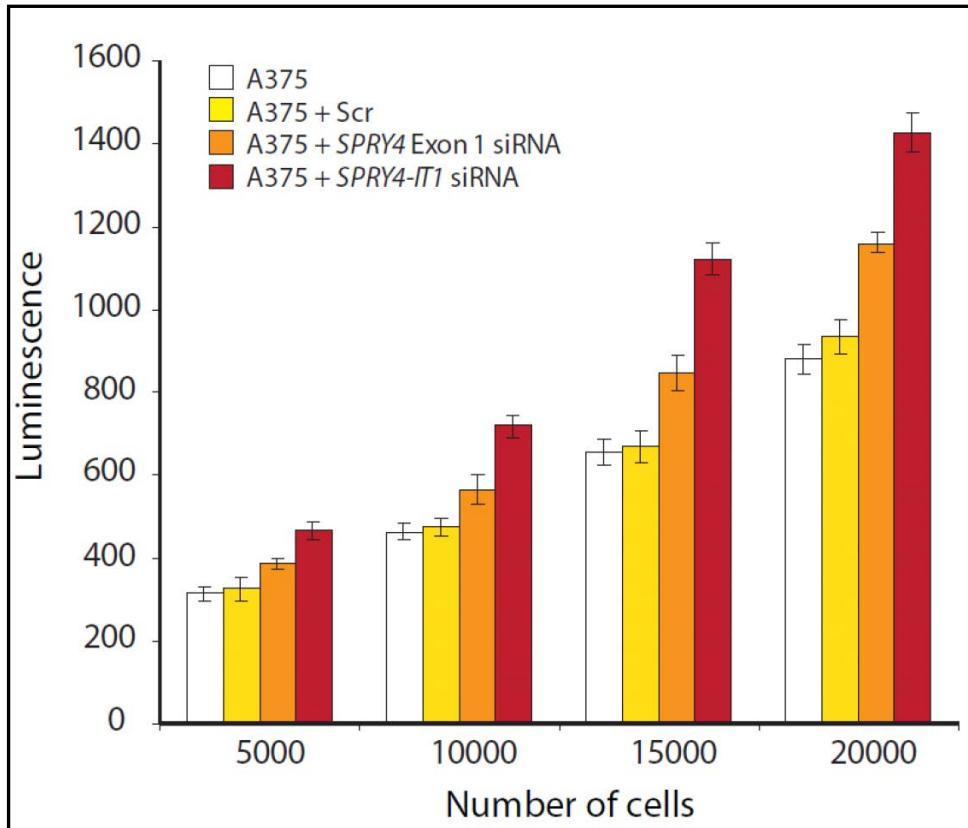

Figure S4. Effects of siRNA Targeting *SPRY4-IT1* and *SPRY4* Exon 1 on Cell Invasion and Apoptosis in A375 Cells  
(A) Invasion efficiency and (B) apoptosis of A375 cells subjected to *SPRY4-IT1* and *SPRY4* exon 1 knockdown. Apoptosis was measured as an increase in caspase 3 activity in a luminescence-based assay.

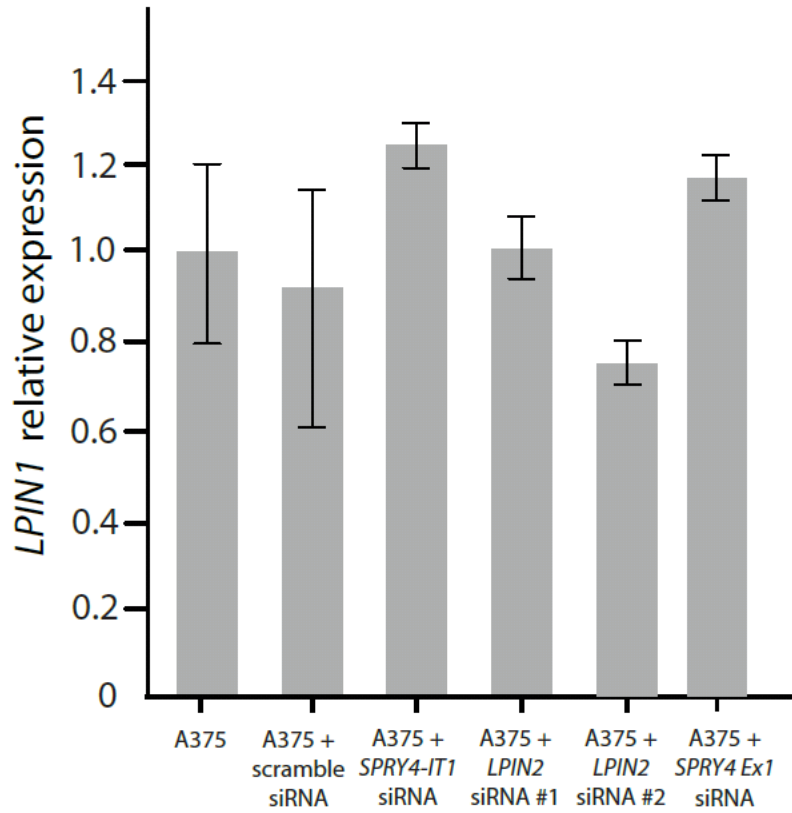

Figure S5. Lipin1 Relative Expression in SPRY4-IT1, SPRY4 Exon1, and Lipin2 Knockdown Cells  
 Knock-down of SPRY4-IT1, SPRY4 Exon1, and Lipin2, does not show lipin1 expression changes.

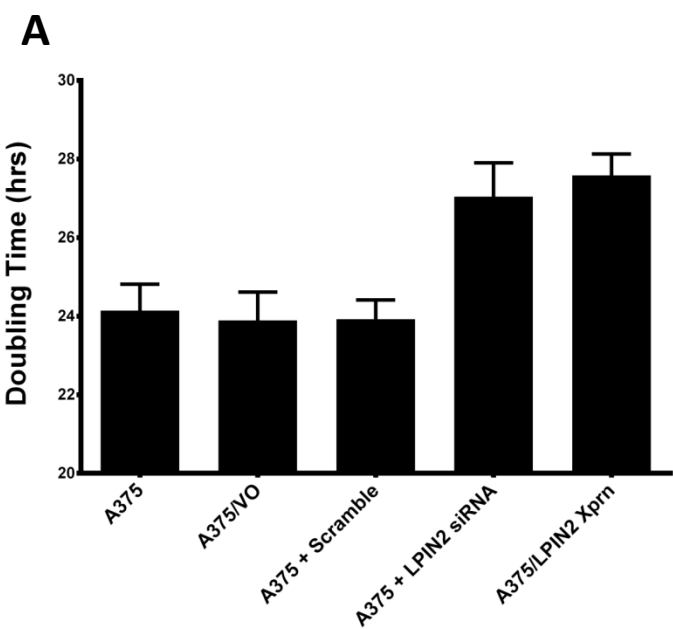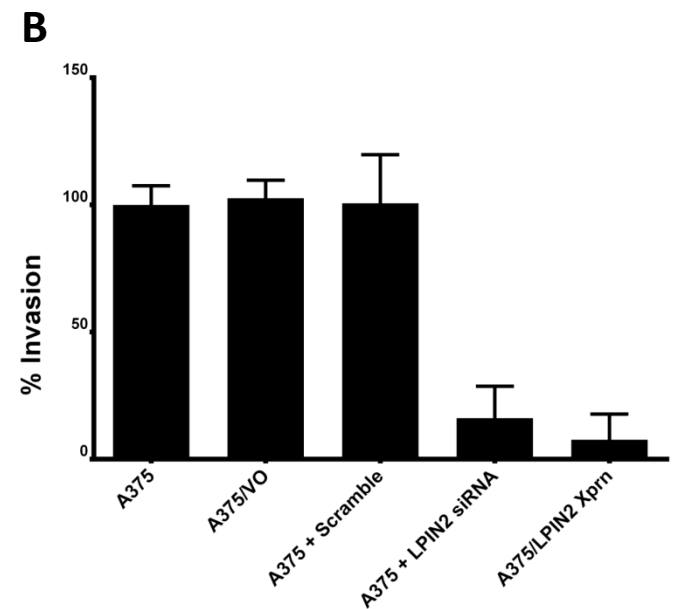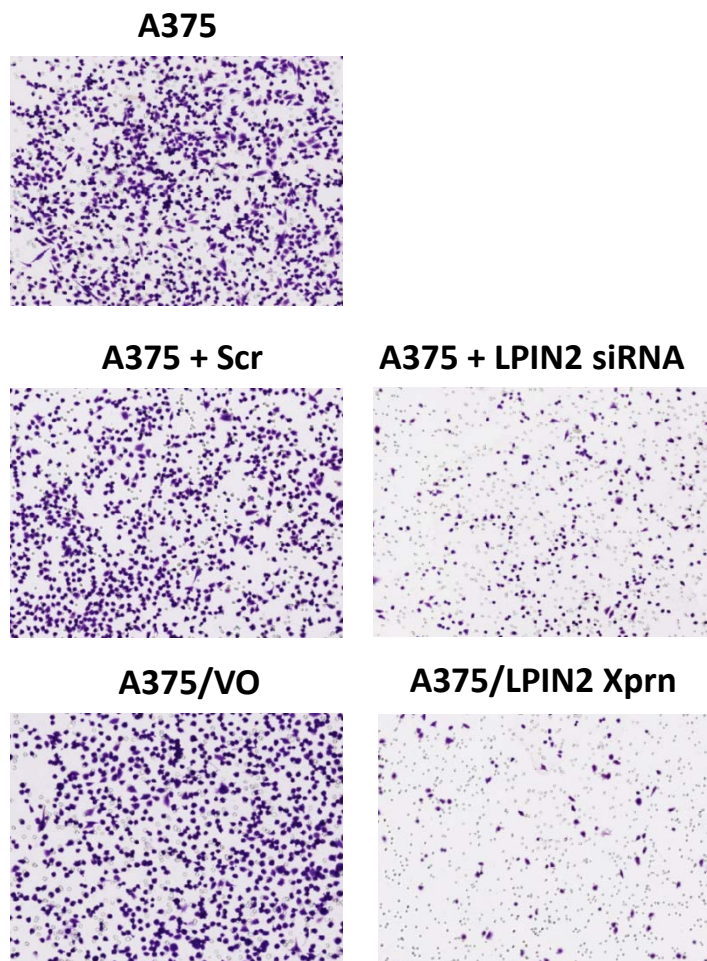

Figure S6. The effect of knock-down and over-expression of lipin 2 on cell growth and invasion in A375 cells

(A) The effect of SPRY4-IT1 knock-down or force-expression on cell growth

(B) The effect of SPRY4-IT1 knock-down or force-expression on cell invasion
