# Supplementary material for: The Functional Characterization of Long Noncoding RNA SPRY4-IT1 in Human Melanoma Cells
Source: PubMed Central journal article supplement (PMC4253410; doi:10.18632/oncotarget.1863), 2014-03-26
Supplement: oncotarget-05-8959-s002.pdf [file oncotarget-05-8959-s002.pdf]

Table S1. SPRY4-IT1-binding Proteins Identified by Mass Spectrometry

Lipin 2 shows the highest spectral counts (83).

| Number                         | Gene Symbol     | Gene description                                     | Subcellular location                   | Molecular function                                                        | Biological process                        | Peptide sequence                    | Nondegenerative sequence? | Instances observed | Total instances per gene |   |
|--------------------------------|-----------------|------------------------------------------------------|----------------------------------------|---------------------------------------------------------------------------|-------------------------------------------|-------------------------------------|---------------------------|--------------------|--------------------------|---|
| 1                              | <i>ILF2</i>     | Interleukin enhancer-binding factor 2                | cytoplasm, nucleolus, nucleolus, nuc   | ATP binding, DNA binding, double-str immune response, positive regulatio  | ILPTLEAVAALGNK                            | Yes                                 | 1                         | 1                  |                          |   |
| 2                              | <i>GPR37</i>    | Probable G-protein coupled receptor 37               | endoplasmic reticulum, endoplasmic     | G-protein coupled receptor activity, G-protein coupled receptor signaling | LAVIIVWVALLLALP                           | Yes                                 | 12                        | 12                 |                          |   |
| 3                              | <i>SLC25A5</i>  | ADP/ATP translocase 2                                | MMXD complex, integral to plasma       | adenine transport, chromosome seg                                         | YFPTQALNFAFK                              | Yes                                 | 1                         | 1                  |                          |   |
| 4                              | <i>RPLP1</i>    | 60S acidic ribosomal protein P1                      | cytoplasm, cytosol, cytosolic large    | rRNA binding, protein binding, struct                                     | RNA metabolic process, cellular prot      | AAGVNVPEFWPLFLAK                    | Yes                       | 2                  | 2                        |   |
| 5                              | <i>IGF2BP1</i>  | Insulin-like growth factor 2 mRNA-binding protein 1  | CRD-mediated mRNA stability compl      | mRNA-UTR binding, mRNA-UTR bin                                            | CRD-mediated mRNA stabilization, R        | MVIITGPPEAQFK                       | Yes                       | 2                  | 2                        |   |
| 6                              | <i>RPS3</i>     | 40S ribosomal protein S3                             | cytoplasm, cytosol, cytosol, cytosolic | DNA-(apurinic or pyrimidinic site) ly                                     | RNA metabolic process, activation of      | FGFPEGSVELYAEK<br>GGKPEPPAMPQVPVPTA | No<br>Yes                 | 2<br>2             | 4                        |   |
| 7                              | <i>RPS6</i>     | 40s ribosomal protein S6                             | cytoplasm, cytosol, cytosolic small    | rR protein binding, protein kinase                                        | BIND RNA metabolic process, T cell        | differe                             | DIPGLTDTTVPR              | Yes                | 2                        | 2 |
| 8                              | <i>LIPIN2</i>   | Phosphatidate phosphatase lipin2                     | ic reticulum, endoplasmic reticulum    | matidate phosphatase activity, transcr                                    | sitive regulation of transcription from   | TIFTPS[167]SVKK<br>TIFTSS[167]VKK   | Yes<br>Yes                | 19<br>83           | 102                      |   |
| 9                              | <i>ALB</i>      | Uncharacterized protein                              | basement membrane, cytoplasm, ex       | DNA binding, antioxidant activity, ce                                     | bile acid and bile salt transport, bile   | -KVPQVSTPTLVEVSR                    | Yes                       | 3                  | 3                        |   |
| 10                             | <i>NACA</i>     | Nascent polypeptide-associated complex subunit alpha | cytoplasm, nascent polypeptide-assc    | DNA binding                                                               | interspecies interaction between org      | IEDLSQQAAQAAAEK                     | Yes                       | 2                  | 2                        |   |
| 11                             | <i>HNRNPCL1</i> | Heterogeneous nuclear ribonucleoprotein c-like 1     | nucleus, ribonucleoprotein complex     | RNA binding, nucleotide binding                                           |                                           | VFIGNLNTLVVK                        | Yes                       | 3                  | 3                        |   |
| 12                             | <i>TRAP1</i>    | Heat shock protein 75 kDa, mitochondrial             | cellular_component, mitochondrion      | ATP binding, nucleotide binding, tur                                      | cellular response to oxidative stress, G  | VVDESDIPLNSLR                       | Yes                       | 13                 | 13                       |   |
| 13                             | <i>TUBB2B</i>   | Tubulin beta-2b chain                                | cytoplasm, cytoskeleton, microtubule,  | nucleotide binding, peptide binding                                       | bule-based movement, mitosis, neur        | AFVHWYTT[181]GEGM[147]DEME          | No                        | 1                  | 70                       |   |
|                                |                 |                                                      |                                        |                                                                           |                                           | AILVDLEPGTM[147]DSVR                | No                        | 15                 |                          |   |
|                                |                 |                                                      |                                        |                                                                           |                                           | AILVDLEPGTM[147]DSVR                | No                        | 1                  |                          |   |
|                                |                 |                                                      |                                        |                                                                           |                                           | AILVDLEPGTMDSVR                     | No                        | 11                 |                          |   |
|                                |                 |                                                      |                                        |                                                                           |                                           | GHYTEGAELVDSVLDVVR                  | No                        | 1                  |                          |   |
|                                |                 |                                                      |                                        |                                                                           |                                           | GHYTEGAELVDSVLDVVRK                 | No                        | 5                  |                          |   |
|                                |                 |                                                      |                                        |                                                                           |                                           | INVYYNEATGNKYVPR                    | Yes                       | 4                  |                          |   |
|                                |                 |                                                      |                                        |                                                                           |                                           | ISEQFTAM[147]FR                     | No                        | 4                  |                          |   |
|                                |                 |                                                      |                                        |                                                                           |                                           | ISEQFTAMFR                          | No                        | 1                  |                          |   |
|                                |                 |                                                      |                                        |                                                                           |                                           | LAVNM[147]VPFPR                     | No                        | 10                 |                          |   |
| LAVNMVPFPR                     | No              | 2                                                    |                                        |                                                                           |                                           |                                     |                           |                    |                          |   |
| LHFFM[147]PGFAPLTSR            | No              | 5                                                    |                                        |                                                                           |                                           |                                     |                           |                    |                          |   |
| LHFFM[147]PGFAPLTSR            | No              | 2                                                    |                                        |                                                                           |                                           |                                     |                           |                    |                          |   |
| LTPPTYGDLNHLVSATM[147]SGVTTCLR | No              | 2                                                    |                                        |                                                                           |                                           |                                     |                           |                    |                          |   |
| LTPPTYGDLNHLVSATMSGVTTCLR      | No              | 2                                                    |                                        |                                                                           |                                           |                                     |                           |                    |                          |   |
| M[147]SATFIGNSTAIQELFK         | No              | 1                                                    |                                        |                                                                           |                                           |                                     |                           |                    |                          |   |
| YLTVAIFR                       | No              | 3                                                    |                                        |                                                                           |                                           |                                     |                           |                    |                          |   |
| 14                             | <i>RPS8</i>     | 40S ribosomal protein S8                             | cytoplasm, cytosol, cytosolic small    | rR structural constituent of ribosome, s                                  | RNA metabolic process, cellular prot      | IIDVVYNASNELVR                      | Yes                       | 2                  | 2                        |   |
| 15                             | <i>HIST1H1B</i> | Histone H15                                          | chromosome, nucleosome, nucleus        | DNA binding                                                               | nucleosome assembly                       | ATGPPVSELTK                         | Yes                       | 1                  | 1                        |   |
| 16                             | <i>HSPE1</i>    | 10 kDa heat shock protein, mitochondrial             | cytoplasm, mitochondrial matrix, mi    | ATP binding, chaperone binding, cha                                       | activation of cysteine-type endopept      | VVLDDKDYFLFR                        | Yes                       | 2                  | 2                        |   |
| 17                             | <i>DPYSL2</i>   | Dihydropyrimidinase-related protein 2                | ondrion, neuronal cell body, protein   | activity, acting on carbon-nitrogen                                       | [titive regulation of glutamate secretion | GLYDGPVCEVSVTPK                     | Yes                       | 2                  | 4                        |   |
|                                |                 |                                                      |                                        |                                                                           |                                           | ILDLDITGPEGHVLSRPEEVEAEAVNR         | Yes                       | 1                  |                          |   |
|                                |                 |                                                      |                                        |                                                                           |                                           | MDENQFVAVSTNAAK                     | No                        | 1                  |                          |   |
| 18                             | <i>VCL</i>      | Isoform 1 of vinculin                                | mere, cytoplasm, cytoskeleton, cytos   | ienin binding, beta-dystroglycan                                          | bndesion, lamellipodium assembly, mor     | AVGT[181]ANKS[167]T[181]VEGIQASVK   | Yes                       | 1                  | 14                       |   |
|                                |                 |                                                      |                                        |                                                                           |                                           | LVQAAQM[147]LQ                      | No                        | 12                 |                          |   |
|                                |                 |                                                      |                                        |                                                                           |                                           | AGVNTVTLVENK                        | No                        | 1                  |                          |   |
| 19                             | <i>RPL7A</i>    | 60s ribosomal protein 7a                             | omal subunit, membrane fraction, p     | protein binding, structural constitue                                     | nt process, ribosome biogenesis, transl   | LKVPAINQFTQALDR                     | Yes                       | 1                  | 2                        |   |
| 20                             | <i>RPL24</i>    | 60S ribosomal protein L24                            | cytosol, cytosolic large ribosomal     | sul RNA binding, structural constitue                                     | nt (RNA metabolic process, cellular prot  | AITGASLADIM[147]AK                  | Yes                       | 2                  | 12                       |   |
| 21                             | <i>IGH@</i>     | Putative matrix cell adhesion molecule-3             |                                        |                                                                           |                                           | LTM[147]TRDTSTST                    | Yes                       | 9                  | 10                       |   |
|                                |                 |                                                      |                                        |                                                                           |                                           | VGPGAHS[167]QVQLVQS[167]GAEVK       | No                        | 1                  |                          |   |
|                                |                 |                                                      |                                        |                                                                           |                                           | ALELALLQGLLG                        | Yes                       | 1                  |                          |   |
| 22                             | <i>NYNRIN</i>   | Isoform 1 of protein nyrin                           | :omponent, integral to membrane,       | molecular_function, nucleic acid bindi                                    | ng DNA integration, biological_process    | LEVT[181]VSHVALTA                   | Yes                       | 1                  | 8                        |   |
|                                |                 |                                                      |                                        |                                                                           |                                           | LEVTVS[167]HVALTA                   | Yes                       | 5                  |                          |   |
|                                |                 |                                                      |                                        |                                                                           |                                           | LPFTFAGNLFMVPDPLGR                  | Yes                       | 1                  |                          |   |
| 23                             | <i>RPSA</i>     | Laminin receptor-like protein lamr5                  | 90S preribosome, cytoplasm, cytop      | rotein binding, receptor activity, r                                      | ibRNA metabolic process, cell adhesior    | AIVAIENPADVSVISR                    | Yes                       | 1                  | 1                        |   |
| 25                             | <i>DDX17</i>    | Probable atp-dependent rna helicase ddx17 isoform 3  | nucleus                                | ATP binding, ATP-dependent helicase                                       | rNA processing                            | ELAQQVQVADDDYK                      | Yes                       | 1                  | 1                        |   |
