# Supplementary material for: The Functional Characterization of Long Noncoding RNA SPRY4-IT1 in Human Melanoma Cells
Source: PubMed Central journal article supplement (PMC4253410; doi:10.18632/oncotarget.1863), 2014-03-26
Supplement: oncotarget-05-8959-s003.pdf [file oncotarget-05-8959-s003.pdf]

**Table S2. Lipidomic Analysis of A375 Cells After Knockdown of SPRY4-IT1**

SPRY4-IT1 knockdown decreases cellular diacylglycerol (DAG) levels by ~10% and increases triacylglycerol levels by ~15%, consistent with the observed effects of SPRY4-IT1 knockdown on acyl-coA:glycerol-3-phosphate acyltransferase 3 (GPAT3) and diacylglycerol O-acyltransferase 2 (DGAT2) expression (Fig. S6).

**Lipidomic analysis of A375 cells subjected to SPRY4-IT1 knock-down**

| <u>Lipid Species</u>                             | <u>A375</u> | <u>IT1</u> | <u>Percentage (%)</u><br><u>(IT1/A375)</u> |
|--------------------------------------------------|-------------|------------|--------------------------------------------|
| Acyl Carnitine (CAR) (pmol/mg protein)           | 0.255286    | 0.460055   | 80.21%                                     |
| Cardiolipin (CL) (nmol/mg protein)               | 4.826375    | 2.595352   | -46.23%                                    |
| Ceramide (CER) (nmol/mg protein)                 | 0.929514    | 1.056996   | 13.71%                                     |
| Diacylglycerol (DAG) (nmol/mg protein)           | 1.898592    | 1.704089   | -10.24%                                    |
| Fatty Acyl Chains in TAG (FA) (nmol/mg protein)  | 51.30639    | 58.61157   | 14.24%                                     |
| Lyso Phosphatidylcholine (LPC) (nmol/mg protein) | 1.224603    | 1.01981    | -16.72%                                    |
| Phosphatidic acid (PA) (nmol/mg protein)         | 1.026541    | 0.639301   | -37.72%                                    |
| Phosphatidylcholine (PC) (nmol/mg protein)       | 49.64564    | 31.98054   | -35.58%                                    |
| Phosphatidylethanolamine (PE) (nmol/mg protein)  | 30.19263    | 34.19713   | 13.26%                                     |
| Phosphatidylglycerol (PG) (nmol/mg protein)      | 2.886709    | 3.42792    | 18.75%                                     |
| Phosphatidylinositol (PI) (nmol/mg protein)      | 12.47999    | 9.012531   | -27.78%                                    |
| Phosphatidylserine (PS) (nmol/mg protein)        | 15.45311    | 11.37352   | -26.40%                                    |
| Sphingomyelin (SM) (nmol/mg protein)             | 12.08027    | 10.85326   | -10.16%                                    |
| Triacylglycerol (TAG) (nmol/mg protein)          | 17.69247    | 20.35036   | 15.02%                                     |
