# Supplementary material for: The Functional Characterization of Long Noncoding RNA SPRY4-IT1 in Human Melanoma Cells
Source: PubMed Central journal article supplement (PMC4253410; doi:10.18632/oncotarget.1863), 2014-03-26
Supplement: oncotarget-05-8959-s004.pdf [file oncotarget-05-8959-s004.pdf]

**Table S3.**  
**Lipidomic analysis Of HEM-I vs A375 Melanoma cells**

| <u>Lipid Species</u>                             | <u>HEM-I</u> | <u>A375</u> | <u>Percentage (%)</u><br><u>(A375/HEM-I)</u> |
|--------------------------------------------------|--------------|-------------|----------------------------------------------|
| Acyl Carnitine (CAR) (pmol/mg protein)           | 19.48        | 37.43       | 92.13%                                       |
| Cardiolipin (CL) (nmol/mg protein)               | 0.26         | 2.11        | 699.67%                                      |
| Ceramide (CER) (nmol/mg protein)                 | 1.26         | 0.74        | -41.17%                                      |
| Diacylglycerol (DAG) (nmol/mg protein)           | 6.40         | 5.46        | -14.70%                                      |
| Fatty Acyl Chains in TAG (FA) (nmol/mg protein)  | 42.79        | 125.15      | 192.45%                                      |
| Lyso Phosphatidylcholine (LPC) (nmol/mg protein) | 0.62         | 1.01        | 63.08%                                       |
| Phosphatidic acid (PA) (nmol/mg protein)         | 1.26         | 1.04        | -17.77%                                      |
| Phosphatidylcholine (PC) (nmol/mg protein)       | 27.23        | 40.85       | 50.01%                                       |
| Phosphatidylethanolamine (PE) (nmol/mg protein)  | 50.61        | 32.79       | -35.21%                                      |
| Phosphatidylglycerol (PG) (nmol/mg protein)      | 1.74         | 1.79        | 2.98%                                        |
| Phosphatidylinositol (PI) (nmol/mg protein)      | 9.97         | 11.28       | 13.09%                                       |
| Phosphatidylserine (PS) (nmol/mg protein)        | 19.55        | 10.15       | -48.05%                                      |
| Sphingomyelin (SM) (nmol/mg protein)             | 12.51        | 3.67        | -70.64%                                      |
| Triacylglycerol (TAG) (nmol/mg protein)          | 11.27        | 32.75       | 190.56%                                      |
